# Supplementary material for: On the tuning of plateaus in atmospheric and oceanic 14 C records to derive calendar chronologies of deep-sea cores and records of 14 C marine reservoir age changes
Source: Copernicus journal article supplement (doi:10.5194/cp-2020-164), 2021-01-08
Supplement: Supplementary file [file cp-2020-164-CC1-supplement.pdf]

1 **RESPONSE to the PREPRINT of E. Bard and T.J. HEATON (B&H)**

2 "On the tuning of plateaus in atmospheric and oceanic  $^{14}\text{C}$  records to derive calendar  
3 chronologies of deep-sea cores and records of  $^{14}\text{C}$  marine reservoir age changes"

4 CLIMATE OF THE PAST, DISCUSSIONS

5

6 Michael Sarnthein<sup>1</sup> and Pieter M. Grootes<sup>2</sup>

7 1 Institute of Geosciences, University of Kiel, 24118 Kiel, Germany

8 2 Institute of Ecosystem Research, University of Kiel, 24118 Kiel, Germany

9

10 **Abstract**

11

12 In response to an extended comment of Bard and Heaton (2021) (B&H) on the synthesis paper  
13 of Sarnthein et al. (2020) we counter their reservations both in the field of statistics and about  
14 the technique of  $^{14}\text{C}$  plateau-tuning (PT), like in a manual, one-by-one, by means of telling lines  
15 of evidence. In particular, we single out the following points of view:

16 -- We show proof that results of PT of marine sediment records are hardly affected by  
17 bioturbational mixing and changes in foraminifera abundance, given the limitation of PT to  
18 cores with sedimentation rates  $>10$  cm/kyr;

19 -- We illustrate the importance of initial guidelines of conventional stratigraphy to confine  
20 overall sedimentation rates as boundary condition and to derive alternative modes of PT for a  
21 whole suite of  $^{14}\text{C}$  jumps and plateaus in a sediment record,  $^{14}\text{C}$  structures to be compared to  
22 those of the paired atmospheric reference record of Lake Suigetsu.

23 -- Extended tests (Balmer & Sarnthein, 2016) revealed that changes in sedimentation rate *per*  
24 *se* are unable to generate a complete suite of  $^{14}\text{C}$  plateaus by now already defined in some 20  
25 sediment cores and independently corroborated by various lines of local evidence.

26 -- Over the interval 10 - 15 cal. ka, the plateau structures of the Suigetsu atmospheric (atm)  $^{14}\text{C}$   
27 record are clearly paired with well-defined tree ring- and floating tree ring-based  $^{14}\text{C}$  structures  
28 (IntCal13; Adolphi et al., 2017). By comparison, we suggest that prior to 15 cal. ka the  
29 continuing  $^{14}\text{C}$  fine structure of noisy Suigetsu with  $^{14}\text{C}$  jumps and plateaus is by far more  
30 realistic than the admittedly smoothed  $^{14}\text{C}$  trend of the Hulu speleothem and IntCal20, records  
31 that may also suffer from unknown but likely changes in the Hulu Dead Carbon Fraction (DCF).

32 -- By comparison to Holocene and late deglacial times, where PT may be constrained by tree  
33 ring records, glacial-to-early deglacial marine reservoir ages (MRA) can indeed be regarded as  
34 largely constant over time spans as long as  $^{14}\text{C}$  plateaus about 500-1000 yr. In turn, major MRA  
35 changes are confined to more extended intervals of climate, sea ice cover, and ocean  
36 circulation similar to those of Heinrich events, Dansgaard Oeschger cycles, and their multiples.  
37 -- Per analogy to the record of 10-15 cal. ka, overall  $^{14}\text{C}$  changes and shifts in the radiocarbon  
38 clock at 15-29 cal. ka are necessarily focused to inter-plateau times, just 18 % of the total time  
39 span as estimated by B&H. This concept indeed was first documented by means of PT.  
40 -- We show that minor intra-plateau changes in MRA indeed exist, although they cannot be  
41 specified by our limited sampling resolution of ~50-150 yr. Careful inspection of the complete  
42 suite of plateaus in each core enabled us occasionally to identify distinct intra-plateau changes.  
43 -- Concerns about low sampling density are unfounded.  $^{14}\text{C}$  structures in pelagic sediment  
44 records like boundaries of  $^{14}\text{C}$  plateaus, were not "under-constrained" by  $^{14}\text{C}$  ages but  
45 systematically documented by iterative sampling.  
46 -- The box model discussion is scientifically correct. However, it only deals with  $Pl_a$ , the  
47 planktic  $^{14}\text{C}$  concentration of ocean surface waters, and not with  $MRA = (Pl_a - Atm)$ .  
48  
49 In view of these findings the technique of PT cannot be regarded as 'result of inherent pitfalls'.  
50 Rather PT is emerging as great opportunity to generate both a suite of narrow-standing and  
51 robust age tie points for marine sediment records and a record of short-term changes in MRA  
52 and paleoceanography for last glacial-to-deglacial times in ocean sediment cores where  
53 independent high-resolution calendar age information is usually rare.

## 55 **1/ Introduction**

56  
57 In the fall 2019, Edouard Bard and Tim Heaton (B&H) got access to the discussion version  
58 (opened in CPD at 25-10-2019) of our paper "Plateaus and jumps in the atmospheric  
59 radiocarbon record – Potential origin and value as global age markers for glacial-to-deglacial  
60 paleoceanography, a synthesis" (Sarnthein et al., 2020). A letter to the Editor of CPD on 31-01-  
61 2020 stated they had written an extended comment to the paper but had submitted it as a  
62 research paper since it "includes substantial material of broad interest to the community using

63 radiocarbon in marine sediments for geochronology and paleoceanography". This preprint is  
64 now subject to our discussion.

65

66 We thank B&H for their time and the efforts they spent for a synthesis to fight the 'misery' of  
67  $^{14}\text{C}$  plateau tuning (PT) that we, in turn, regard as accomplishment and 'blessing'. Their  
68 detailed arguments and reasoning nicely extend far down to basic processes that may control  
69 an atmospheric and sedimentary  $^{14}\text{C}$  record and are important when trying to specify a great  
70 number of major-to-minor potential pitfalls in our approach. Our response may help to clear  
71 various misconceptions and clarify crucial aspects of PT method, since all of us aim to find the  
72 best-possible technique to generate proper age control of ocean sediment records as now  
73 achieved by PT. In the following text-sections we try to summarize -- one by one -- the main  
74 concerns raised by B&H about PT in a brief initial statement. Subsequently, we give a detailed  
75 discussion and/or rebuttal of these concerns on the basis of our scientific reasoning and  
76 practice in PT.

77

## 78 **2/ Paleoclimatic and paleoceanographic perspective**

79

80 *2.1/ No independent constraint on sedimentation rate changes possibly creating  $^{14}\text{C}$  plateaus*  
81 -- For each marine sediment core PT is constrained on the basis of stratigraphic guidelines  
82 derived from widely accepted marine stratigraphic techniques such as  $\delta^{18}\text{O}$  stratigraphy  
83 and/or sea surface temperature and climate records tuned to polar ice core stratigraphy (e.g.,  
84 Voelker et al., 1988; Gebhardt et al., 2008; de la Fuente et al. 2015; Skinner et al., 2010;  
85 Waelbroeck et al., 2019; Wang et al., 1999). PT does not abolish but refine conventional age  
86 control. It is a wiggle matching technique that compensates for the lack of lamination in most  
87 sediment cores by matching a suite of plateaus covering thousands of years.

88 -- PT requires permanent monitoring of changes in short-term sedimentation rate at plateau  
89 boundaries. As a rule, rates of change between one plateau and the next are low. If they  
90 exceed a factor of 1.5 the guideline for PT suggests detailed inspection of sediment  
91 parameters to trace the origin of the changing sedimentation regime.

92 -- Model tests of Balmer & Sarnthein (2016) show that sections with enhanced sedimentation  
93 rates *per se* are virtually unable to explain a long suite of  $^{14}\text{C}$  plateaus extending over sediment  
94 sections of up to tens of cm each.

95 Examples of independent PT confirmation are:  
96 -- PS97-137 off Southern Chile (Küssner et al., 2020): A rough count of sediment laminations  
97 has fairly well confirmed the length of a PT-derived paired  $^{14}\text{C}$  plateau for the LGM.  
98 -- MD07-3088 off Central Chile (Küssner et al., 2020): Sedimentation rates and ages are  
99 confirmed by succession of four independent age values of ash layers.  
100 -- MD07-3076, mid-ocean ridge South Atlantic (Balmer et al., 2016): Perfect match of PT-based  
101 MRA with MRA deduced by correlation to Antarctic ice cores.

102

103 **2.2/ Questionable claim for PT that Marine Reservoir Ages (MRA) have to be 'strictly constant'**  
104 **over single plateaus**

105 This statement presents a misinterpretation.  $^{14}\text{C}$  structures in pelagic sediment records were  
106 not "under-constrained" by  $^{14}\text{C}$  ages but systematically documented by iterative sampling, in  
107 particular close to plateau boundaries.

108 -- As nicely shown by B&H in Fig. 3, the  $^{14}\text{C}$  concentrations in the atmosphere have been, and  
109 still are, varying irregularly on centennial time scales. PT is based on a close comparison of the  
110 *full suite* of planktic  $^{14}\text{C}$  concentrations in a sediment core - averaged into one  $^{14}\text{C}$  value for each  
111 low-slope section called 'plateau' - with their contemporaneous counterparts in the Suigetsu  
112 record of past atmospheric  $^{14}\text{C}$  concentration.

113 -- PT gives (1) a suite of age tie points derived from translating U/Th-age based atmospheric  
114 plateau boundaries to the plankton-based  $^{14}\text{C}$  record on a depth scale and (2) a record of  
115 average  $^{14}\text{C}$  age differences between sedimented plankton and atmosphere, that is, of varying  
116 local Marine Reservoir Age (MRA). On the basis of conventional age control and internal  $^{14}\text{C}$   
117 plateau structures PT, of course, needs to ponder the best-possible match between the full two  
118 curves for the glacial-to-deglacial period considered. Plotting the derived atmospheric age tie  
119 points against core depth allows for variable sedimentation rates. No further assumptions are  
120 needed!

121 -- Most  $^{14}\text{C}$  plateaus cover time spans of 300-700 yr each, rarely reaching up to 1100 yr, in  
122 agreement with Fig. 3 of B&H. We see no problem in accepting that the ocean carbon cycle and  
123 MRA have in most cases not been subject to major changes over these time spans and that  
124 changes were confined to short intervals in between. Major changes in MRA generally occur  
125 more rarely, at times of documented major change in ocean circulation such as in the context of  
126 Dansgaard-Oeschger (DO) and Heinrich events.

127 -- Centennial-scale scatter of  $^{14}\text{C}$  values occurs *within* each single plateau defined as a  $^{14}\text{C}$   
128 scatter band with low or no slope with time/sediment depth. This scatter may indeed reflect  
129 real small-scale limited changes on decadal-centennial time scales besides sampling and  
130 measurement uncertainty. These minor variations have consciously been averaged for each  
131 plateau, since they can't be properly resolved by our sampling density and their small size  
132 makes them difficult to identify and separate from noise in the sediment and in the Suigetsu  
133 atmospheric  $^{14}\text{C}$  record. The offset between the averaged planktic and atmospheric plateau  
134 bands defines the MRA averaged over single plateaus as an approximation of the more complex  
135 and variable system.

136 -- In about a quarter of all cores one or more plateaus of the suite were distorted, in particular  
137 near DO event 1. Here major changes in MRA were indeed uncovered within the time span of a  
138 plateau by means of systematically testing (and rejecting) of various alternative models used  
139 to tune a complete suite of plateaus and careful comparison of the complete suite and internal  
140 structure of plateaus registered in the  $^{14}\text{C}$  record. In this way also "false" plateaus that B&H  
141 warn against in line 105-114 were unmasked. In a number of cases (as listed in section 2.1) PT-  
142 based MRA values were confirmed by independent tephra-based ages and further lines of age  
143 control based on conventional correlation of paleoceanographic tracers that likewise are  
144 subject to multiple uncertainties.

145 -- Careful PT develops high-resolution age control and provides MRA as input to document  
146 sequential short-lived changes in the carbon cycle, often related to short-term ocean  
147 circulation changes as 'real' events more rarely occurring at millennial scales. Prior to 15 cal. ka  
148 such information was largely missing on the basis of conventional age control that assumes  
149 long-term MRA means. New developments in reservoir age modeling are also improving this  
150 situation (Heaton et al., 2020; Butzin et al., 2020), but generally lack the spatial resolution to  
151 match specific sediment cores.

152

153 **2.3/ 'Rung ladder' versus 'staircase' of age tie points - workable approximation vs. claim for**  
154 *reality?*

155 -- In part, the different wording simply results from using more or less stretched Y-scales and  
156 differential intra-plateau slopes in a  $^{14}\text{C}$  age vs cal. age plot (B&H, Fig. 1). Different from this  
157 Fig. 1, the slope of  $^{14}\text{C}$  scatter bands is not necessarily perfectly zero, as shown by tree ring-  
158 based records, e.g., near 10 cal. ka, and in 1st-derivative plots.

159 -- Figs. 1-3 of B&H form a useful base for discussion, although Fig. 1 unfortunately lacks a  
160 reconstruction of the crucial time section 10 to 14 ka. Here Suigetsu and tree ring data overlap  
161 giving the great opportunity to weigh Suigetsu  $^{14}\text{C}$  plateaus against a truly atmospheric and  
162 better-defined plateau record based on tree rings of IntCal13 (Sarnthein et al., 2020, Fig 2;  
163 IntCal20 then not available yet; Reimer et al., 2020). The six plateaus defined for Suigetsu  
164 indeed match the seven of IntCal13, where Plateau 1a of Suigetsu may in reality depict two  
165 smaller ones in IntCal13. Vice versa,  $^{14}\text{C}$  structures based on Hulu Cave ages are matched by  
166 significantly more scatter. Accordingly, we trust the Suigetsu record more than IntCal20  
167 dominated by Hulu as best possible indicator of atmospheric  $^{14}\text{C}$  beyond 14 cal. ka. This is  
168 corroborated by a comparison of Figs. 1, 2, and 3a and b of B&H that show the smoothed  
169 character of non-tree-ring IntCal20 relative to that of Suigetsu, thus a loss of fine structure  
170 needed for PT, as implied from the 10-to-14 ka intercomparison.

171 -- IntCal20 is the most reliable  $^{14}\text{C}$  calibration presently available, but integrates  $^{14}\text{C}$  ages from  
172 various carbon archives that in part filter the atmospheric  $^{14}\text{C}$  signal through surface water and  
173 groundwater reservoirs, hence dampen  $^{14}\text{C}$  fluctuations. In addition, local effects on the dead-  
174 carbon fraction by changes in rain fall, vegetation, soil cover, and  $\delta^{13}\text{C}$  that occur on millennial-  
175 scales may influence the Hulu cave  $^{14}\text{C}$  record (Kong et al., 2015). Also, coral- and foraminifera-  
176 based marine  $^{14}\text{C}$  records are subject to variable MRA assumptions. Prior to 15 cal. ka, floating  
177 tree ring sequences are rare. Following the principle "absence of evidence is no evidence of  
178 absence" the lack of structures in the IntCal20 curve is far more speculative and dubious than  
179 the suite of structures recorded in the only direct atmospheric  $^{14}\text{C}$  record of Suigetsu.

180 -- Since short-term plateau structures are distinct and common in the tree ring-based deglacial  
181 record 10-15 cal. ka (including plateau #1), moreover, all over the Holocene  $^{14}\text{C}$  record, though  
182 much shorter, any lack of pertinent atmospheric  $^{14}\text{C}$  structures over the preceding deglacial and  
183 peak glacial period would imply an assumption highly inconsistent, even if hypothesized by B&H  
184 in section 3.1.

185 -- B&H are concerned about the large portion of atmospheric  $^{14}\text{C}$  drops at  $^{14}\text{C}$  jumps that  
186 encompass only 18% of the total time span studied. Thus, radiocarbon would have never  
187 behaved as a 'normal' geochronometer merely driven by regular radioactive decay, a claim our  
188 results of PT indeed confirm. (i) This concern overlooks considerable internal secondary  $^{14}\text{C}$   
189 variations within most plateaus, including possibly spurious drops and  $^{14}\text{C}$  reversals, that we  
190 necessarily eliminated by averaging the  $^{14}\text{C}$  age over a plateau.

191 -- (ii) Indeed, we may get accustomed to accept that centennial-scale jumps of atmospheric  $^{14}\text{C}$   
192 age, similar to those found in the tree ring record for the last 15 cal. ka, paired with deep  
193 ocean circulation changes are real and form the rule rather than the exception. Plateaus during  
194 times of glacial-to-deglacial climate change appear far longer than most plateaus of the  
195 climatically 'quiet' Holocene, the last 8500 yr, which may reflect a different cause. We  
196 welcome B&Hs' notice of numerous, though unlikely abrupt rises in atmospheric  $^{14}\text{C}$ . Also, we  
197 ourselves have discussed them internally already over years and regard them as valuable novel  
198 signals of short-term variations in ocean-atmospheric carbon exchange. As B&H say, processes  
199 controlling these partly fairly instantaneous processes are complex and difficult to model but  
200 highly challenging and worth to be traced by future studies.

201

202 **2.4/ B&H complain about a lack of a single figure illustrating all twenty marine  $^{14}\text{C}$  records as**  
203 **compared to their atmospheric  $^{14}\text{C}$  curve used for calibration – Justification of hiatuses.**

204 In Sarnthein et al. (2020) we decided to avoid a repetition of basic data sets already published  
205 and documented elsewhere. Also, we were advised to reduce the length of our synthesis  
206 paper. Thus Figs. S2 did not intend to display the qualities of MRA derivation but the global  
207 spatio-temporal distribution of MRA results. Further below, Fig. 1 may serve as example to  
208 illustrate the technique of PT.

209 -- In most sediment cores the published lineups of records show that the alignment of the  
210 suite of planktic  $^{14}\text{C}$  plateaus to the paired atmospheric  $^{14}\text{C}$  calibration curve is fairly robust. In  
211 contrast to claims of B&H, most short-term changes in sedimentation rate between  
212 consecutive plateaus are low, hardly exceeding a factor of 1.5-2.0. Sporadic major shifts  
213 indeed mark climate tipping points (such as depicted in laminated sediments of SW Pacific  
214 core MD08-3180 near to Heinrich Event 2 and/or by reversals of the Denmark Street Overflow  
215 during early HS-1 in core PS2644).

216 -- Different from the claim of B&H, careful visual inspection of pertinent sediment sections and  
217 local proxy records have proven that the hiatuses contested by B&H also form distinct  
218 sediment unconformities, hence must not be discarded as artifact of PT. Several stratigraphic  
219 gaps are simply reflected by "mega-jumps" in the high-resolution  $^{14}\text{C}$  record (e.g., cores  
220 PS75/104-1, PS97/137-1, SO213-76, 17940 from South Pacific and South China Sea; synthesis  
221 Figs. S2c, d). These lines of evidence were discussed at length in various source papers  
222 summarized in our synthesis paper. Though widely not appreciated by paleoceanographers,

223 hiatuses appear to be a feature actually widespread at high-sedimentation rate sites in the  
224 deep sea – One may assume: The higher the rates the more extreme they may be subject to  
225 changes in depositional regime.

226 -- B&H are concerned about recent changes in our plateau assignment for two South Pacific  
227 cores. These changes are the result of a valuable discussion on alternative tuning modes  
228 ongoing after a first public display of data in CPD. Finally, we choose the mode better  
229 supported by various lines of sediment-based evidence.

230

231 **2.5/** B&H regret that *the focus of PT on <sup>14</sup>C plateaus may leave large parts of <sup>14</sup>C record unused*  
232 *in the process of matching a marine <sup>14</sup>C record to the atm. <sup>14</sup>C record of Suigetsu.*

233 Conversely, Svetlik et al. (2019) just regard the high-slope parts of the <sup>14</sup>C record as crucial for  
234 defining the absolute chronology. Under this topic B&H introduce to a discussion of basic  
235 objectives.

236 -- The concern of B&H is opposed to that discussed in TOPIC 2.2, where they calculated (and  
237 are concerned) that Suigetsu-based plateaus cover 82% of the total time. The remaining 18%,  
238 that are the <sup>14</sup>C jumps in our Suigetsu record, may indeed confirm the conceptual model of  
239 Svetnik et al., hence form the crucial tie points for correlation to radioactive age control and to  
240 constrain past changes in MRA. Here it may be remembered that the distribution 82%/18% in  
241 part results from our choice of the length of the strictly horizontal plateaus and simplifies  
242 reality. Hence, we basically follow B&H in claiming that (most) "changes to MRA could only  
243 occur at plateau boundaries". Elsewhere changes may exist but cannot be resolved by the PT  
244 method. In summary, MRA derived from PT do form the best possible reconstruction available.

245 -- By now, the "special significance" required by B&H was only found for few plateaus of our  
246 <sup>14</sup>C calibration curve (e.g., Plateau YD, 1, and lower 2a; see our synthesis Fig. 6). Here we  
247 propose a potential link to rare deglacial events of major ocean degassing similar to that on  
248 top of the YD and HE-1.

249 -- We agree with B&H that aligning the entire <sup>14</sup>C record of a marine sediment core with that of  
250 the Suigetsu target curve, analogous to the wiggle matching technique for tree ring sequences,  
251 is the approach of our PT technique. Since our first paper of 2007 we stress the need that <sup>14</sup>C  
252 records should be aligned as a whole with their shape, not just with piecewise constant or  
253 slightly different offsets within and between the plateaus, the key to our MRA estimates.

254



255 **2.6/ Potential role of bioturbational mixing for <sup>14</sup>C plateaus.**

256 <sup>14</sup>C plateaus in marine sediments of course were checked for potential 'natural' changes in  
257 sedimentation rates by means of conventional stratigraphic markers (SST,  $\delta^{18}\text{O}$ , etc.; see  
258 discussion on Topic 2.1) always employed as initial stratigraphic guideline. Also, the impact of  
259 bioturbational mixing was not overlooked as potential factor influencing <sup>14</sup>C plateaus (e.g.,  
260 Küssner et al., 2018). Based on various lines of evidence and in view of the rule that PT is only  
261 applied to a complete suite of <sup>14</sup>C plateaus each, that is >80% of a <sup>14</sup>C record, bioturbation now  
262 was somewhat downgraded as potential factor for the origin of plateaus:

263 -- For PT, <sup>14</sup>C ages were only measured on monospecific plankton samples, on species that  
264 continued in the region studied over glacial to interglacial times (except for mixed samples  
265 from ODP Site 1002D; Hughen et al., 2006). This is in contrast to troubling pioneer records of  
266 Duplessy et al. (1986) and Bard et al. (1987), who compared stable-isotope and <sup>14</sup>C records of  
267 different species either characteristic of interglacial or of glacial times. Accordingly,  
268 bioturbational mixing resulted in a divergence of signals reaching up to 30 cm (i.e.,  $\pm 15$  cm) at  
269 deglacial times of abrupt climate change.

270 -- Trauth et al. (1997) gave first precise estimates of bioturbational mixing depth being clearly  
271 related to the local flux of nutrients / organic carbon. Low flux rates lead to mixing depths of 2-  
272 4 cm depth, high flux rates up to 8-12 cm. Thus, the position of plateau boundaries derived for  
273 a suite of plateaus in high-sedimentation rate cores may hardly present an artifact of  
274 differential bioturbational mixing, except for times of abrupt major change in nutrient flux.

275 -- We only applied PT to cores with average sedimentation rates of >10 cm/kyr. In many cores  
276 the rates exceed 20-40 cm/kyr and go up to >200 cm/kyr. The high rates contrast with most  
277 records <sup>14</sup>C-dated in early days, where bioturbational mixing was particularly relevant at  
278 pelagic sedimentation rates of 2-5 cm/kyr.

279 -- In some cores crucial for paleoceanography (e.g., MD08-3180; PS97-137-1) sediment  
280 lamination is definitely precluding any role of bioturbational mixing for <sup>14</sup>C plateaus.

281 -- PT of Core SHAK6K-05 provides a nice test case (Fig. 1) to compare short-term changes in the  
282 abundance of the planktic foraminifer *Globigerina bulloides* with the position and length of  
283 paired <sup>14</sup>C plateaus (Ausin et al., 2019 and 2021). In contrast to conjectures of B&H, none of  
284 the twelve plateaus up to >15 cm long is linked to any abrupt change in species abundance.  
285 The plateaus just display, one-by-one, the reference suite of paired Suigetsu atmospheric

286 plateaus. Local high sedimentation rates of 10-30 cm/kyr probably exceed by far the depth of  
 287 ongoing bioturbational mixing (up to  $\pm 7$  cm; Ausin et al., 2019).

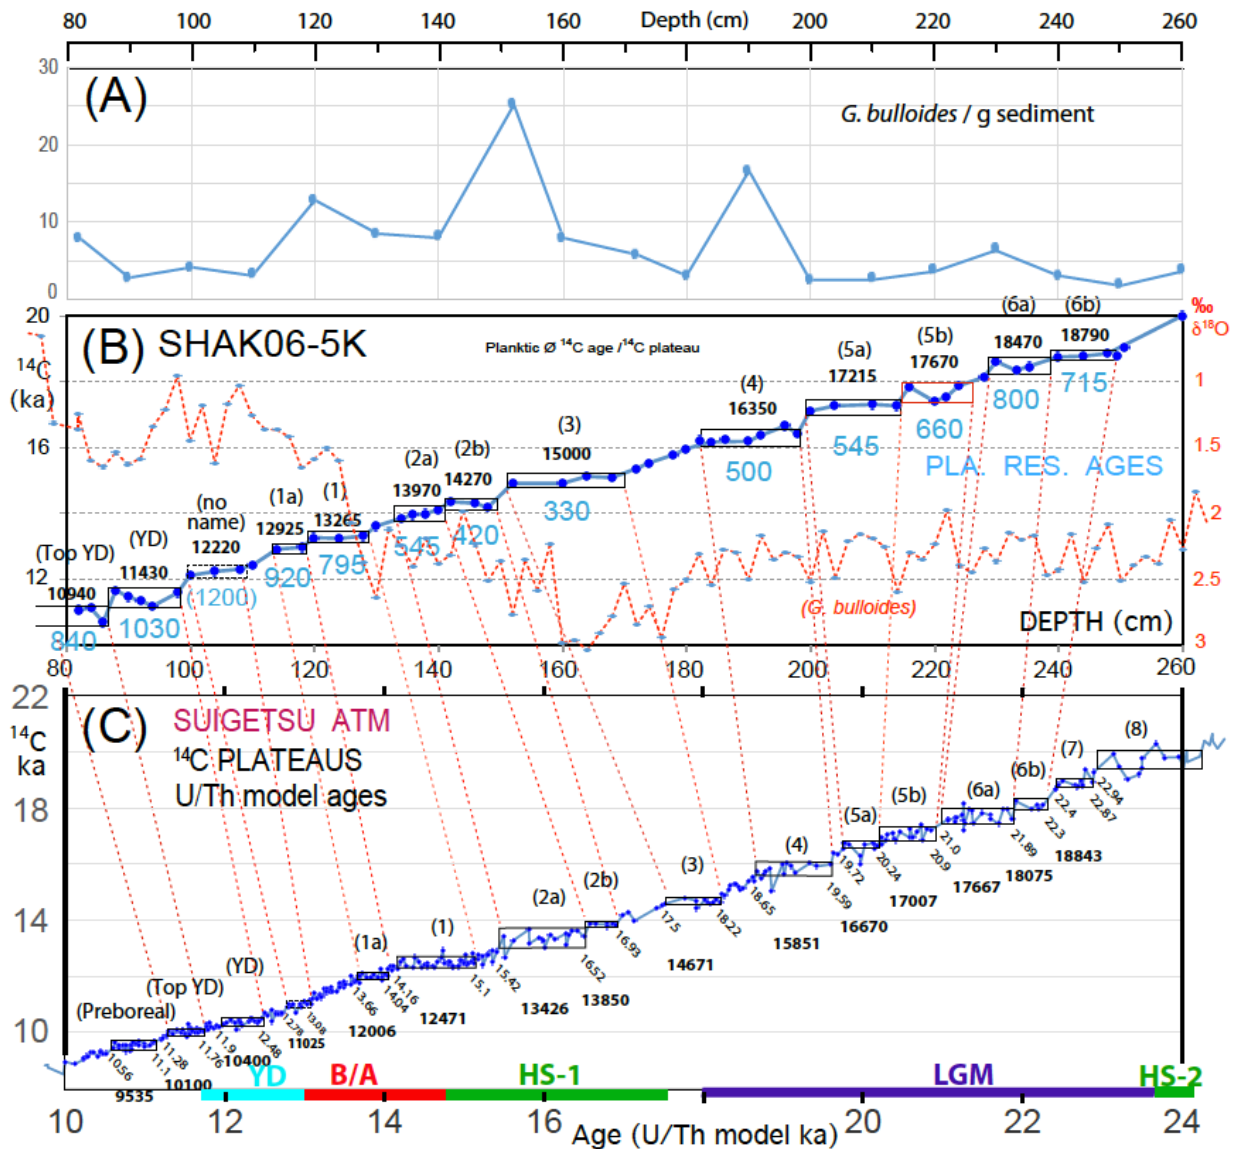

288

289 Figure 1. PT of planktic  $^{14}\text{C}$  record from core SHAK06-5K with atmospheric (atm)  $^{14}\text{C}$  record  
 290 from SUIGETSU. A) Abundance of planktic foraminifera *Globigerinoides bulloides*. B) Planktic  
 291  $^{14}\text{C}$  ages (blue dots) and oxygen isotope record ( $\delta^{18}\text{O}$ , red dotted line) measured on *G.*  
 292 *bulloides*,  $^{14}\text{C}$  plateaus (black boxes), mean planktic  $^{14}\text{C}$  age of each plateau (black numbers),  
 293 and MRA (blue numbers) (Ausin et al. [2019] and [2021] modified).  $^{14}\text{C}$  plateau numbers in B  
 294 are deduced by visual correlation with C) atm.  $^{14}\text{C}$  ages from Lake Suigetsu (blue dots),  
 295 corresponding atm.  $^{14}\text{C}$  plateaus (black boxes), and age control points (cal. ka) plotted versus  
 296 U/Th-based model ages of Bronk Ramsey et al. [2012]. YD = Younger Dryas, B/A = Bølling-  
 297 Allerød, HS1 and HS2 = Heinrich Stadial 1 and 2, LGM = Last Glacial Maximum.

298

299 **2.7/ Potential conflict of a sharp match of marine <sup>14</sup>C-age plateaus with atmospheric plateaus**  
300 *with the general understanding of the carbon cycle (see B&H lines 318 ff).*

301 -- B&H employ numerical (box) model experiments showing that both damping and phasing  
302 effects in marine surface waters may be in conflict with the main assumption of synchronicity  
303 of atmospheric and ocean signals of <sup>14</sup>C production. To meet this concern, we refer, like B&H,  
304 to the effect <sup>14</sup>C bomb spike of the early 1960s. The discussion of B&H focuses on changes in  
305 the surface ocean and correctly describes the limitations of <sup>14</sup>C variability in this reservoir. Yet  
306 they forget that  $MRA = (P_{la} - A_{tm})$  and that the large variability of atmospheric <sup>14</sup>C, as seen in  
307 Miyake events and the bomb spike, means that also MRA can show variations much larger and  
308 more rapid than displayed by the box model.

309

310 **2.8/ Plateaus were possibly linked to carbon cycle changes due to abrupt changes in meridional**  
311 *overturning circulation (MOC) like that at the end of the YD and HS1 events.*

312 -- As already outlined under Topic 2.5, we indeed found clues for the required "special  
313 significance" of few plateaus of our <sup>14</sup>C calibration curve, that is, for Plateau YD, 1, and lower  
314 2a, as was discussed in the context of our synthesis Fig. 6.

315 -- Ocean-induced changes of the atmospheric carbon inventory may indeed result in 'very  
316 minor' (in the context of paleoceanographers), up to decade-long regional delays of the <sup>14</sup>C  
317 signal between different ocean regions with and without outgassing of deep-water CO<sub>2</sub>. For  
318 outgassing regions B&H mention potential large effects with no delay. Elsewhere we have the  
319 same situation as discussed in 2.7. In view of the general broad uncertainty of conventional  
320 age estimates for marine sediment records (except for rare ages of marine ash layers; see the  
321 introduction of our synthesis) we agree with B&H that also an age control based on PT, though  
322 in our view far superior to conventional techniques, may hardly succeed to further constrain  
323 these regional age shifts covering less than 100 years.

324

325 **2.9/ We missed to give in our synthesis paper (not intended to serve as textbook) a reference**  
326 *to early reconstructions of MRA on the basis of marine volcanic ash layers by Bard (1988) and*  
327 *Bard et al. (1994), a lack revealed by B&H. In turn, we tried to stress that several PT-based age*  
328 *estimates are clearly reproduced by those ages of specific ash layers in the meantime widely-*  
329 *established (here by Siani et al. (2013)).*

330

331 **3.1 - 3.8/ Statistical perspective**

332

333 **3.1/ Identification and correct match of 'true <sup>14</sup>C age plateaus' in sparsely sampled and noisy**

334 *marine records despite potential influence of MRA changes and bioturbation (also see 2.3)*

335 -- PT tuning is blamed for a lack of proof by any independent age control. This concern can be

336 clearly rejected: In each marine sediment core PT has been constrained on the basis of initial

337 stratigraphic guidelines derived from various conventional marine stratigraphic techniques

338 such as  $\delta^{18}\text{O}$  stratigraphy and/or sea surface temperature records tuned to polar ice core

339 stratigraphy (Rae et al., 2014; Sarnthein & Grootes, 2007; Sarnthein et al., 2015).

340 -- In contrast to suggestions of B&H, the correct pairing of plateaus identified both in marine

341 and atmospheric <sup>14</sup>C records formed a central topic of discussion for each basic description of

342 <sup>14</sup>C plateaus in a marine sediment core published so far (e.g., Sarnthein et al., 2015; Balmer et

343 al., 2016). Again, we should emphasize that the full suite of plateau was considered instead of

344 individual plateaus, as regularly suggested by B&H. In part, we handled the problem by frankly

345 discussing alternative tuning modes (e.g., Küssner et al., 2020). In part, we admitted minor

346 refinements in the mode of tuning of a suite of plateaus in papers published later-on, that is,

347 as soon as additional lines of independent evidence were available.

348

349 **3.2/ Assignment of plateaus in marine <sup>14</sup>C records may be biased by too noisy data sets of**

350 *marine sediment cores to a likewise noisy atmospheric record of Lake Suigetsu.*

351 -- B&H argue that the dead carbon fraction (DCF) of the Hulu Cave speleothem record has

352 been stable around a low value of  $480 \pm 55$  <sup>14</sup>C yr and has not masked potential atmospheric

353 plateaus in the Hulu <sup>14</sup>C record. Their conclusion is based on model tests and on a comparison

354 of Hulu data for individual speleothems with tree-ring <sup>14</sup>C ages for the Allerød–Younger Dryas

355 and Younger Dryas–Holocene transitions (Southon et al., 2012). Unfortunately, B&H ignore

356 significant centennial-to-millennial-scale variations in a paired  $\delta^{13}\text{C}$  record (by up to 7 per mil)

357 over the period 23-10 cal. ka. In part these changes result from changes in climate-controlled

358 soil-organic matter either derived from C3 (more negative  $\delta^{13}\text{C}$ ) or from C4 (more positive  $\delta^{13}\text{C}$ )

359 biomes prevailing in the formation of soil overlying the Hulu speleothem (Dorale & Liu, 2009;

360 Reimer et al., 2020). In part, however, the change is controlled by the intensity and thickness of

361 differential soil formation that definitely is far more advanced at humid C3 than for semiarid C4

362 biomes. Hence  $\delta^{13}\text{C}$  changes in part form a rough proxy for the role of changing DCF for  $^{14}\text{C}$   
363 records in response to ( $\delta^{18}\text{O}$ -derived) climate change (Kong et al., 2005), variations not  
364 satisfyingly calibrated yet by Southon et al. (2012). Consequently, we do not see any need  
365 either "to smooth Suigetsu-based records" and/or to adjust the marine MRA to a marine  
366 average MRA of 480 yr used by the authors.

367 -- As pondered by B&H, a potential time-directional filtering of atmospheric  $^{14}\text{C}$  signals by the  
368 Hulu speleothem may indeed be revealed by detailed analysis of the outlined  $\delta^{13}\text{C}$  record. It  
369 shows major shifts that lag paired  $\delta^{18}\text{O}$  shifts by  $\sim 650$  to  $700$  yr (Kong et al., 2005).

370 -- Prior to 21 cal. ka, some  $^{14}\text{C}$  plateaus of Suigetsu (e.g., Plateau #8, though also reflected in  
371 the Hulu record; and #10b) indeed are more difficult to define than other plateaus due to  
372 analytical uncertainties amongst three different  $^{14}\text{C}$  laboratories.

373 -- B&H used the Bayesian spline statistical method for Suigetsu-based  $^{14}\text{C}$  ages for Figs. 1 and  
374 3a. Fig. 1 expands the scale of the Y-axis by more than a factor 2 relative to the X-axis, which  
375 necessarily subdues the optical effect of  $^{14}\text{C}$  'plateaus', but stresses the analytical uncertainties  
376 as compared to the 'green line' indicating the 15 plateaus listed in Table 1 of Sarnthein et al.  
377 (2020). Nevertheless, Fig. 1 shows a decent general agreement between the green PT curve  
378 and the pink 95% Bayesian spline range. Prior to 20 cal. ka, minor differences may be due to  
379 slight revisions of calendar ages listed by Bronk Ramsey et al. (2020) as compared to the ages  
380 Bronk Ramsey et al. published 2012, minor age shifts not properly assessed yet in the  
381 definitions given by Sarnthein et al. (2020).

382 -- In Fig. 2 B&H compare our record of  $^{14}\text{C}$  plateaus with the IntCal20 curve. The smoothed  
383 character of IntCal20 beyond 13.9 cal. ka has been generally acknowledged. As explained by  
384 B&H in 3.8, this results from the IntCal aim to provide point wise summaries of the average of  
385 data from many different data sets, including carbonate-based marine data and speleothems,  
386 for the most reliable calibration of single radiocarbon results. This makes IntCal20 less suitable  
387 for exploring the fine structure of the atmospheric  $^{14}\text{C}$  record than the purely atmospheric  
388 Suigetsu record.

389

390 **3.3/** *Low  $^{14}\text{C}$  sampling resolution for Lake Suigetsu and, even more so, for marine sediment*  
391 *records as compared to annually resolved the tree ring record may lead to a misalignment of*  
392 *marine records.*

393 -- The Suigetsu record shows an average sampling resolution of 20 yr at a highly resolved  
394 section near 14 cal. ka and one of 40-100 yr between 18 and 29 cal. ka. In turn, PT has been  
395 restricted by definition to plateaus longer than 300 yr, hence requires a minimum overall  
396 sampling resolution of marine sections better than 100-200 yr and one of 70-100 yr for  
397 sediment sections near plateau boundaries achieved by iterative sampling. Enhanced sampling  
398 resolution *within* a  $^{14}\text{C}$  plateau has turned out as redundant and waste of effort.  
399 -- In harmony with  $\delta^{18}\text{O}$  and various other high-resolution stratigraphic records that are used  
400 as initial stratigraphic guideline, *PT only identifies the whole suites of  $^{14}\text{C}$  age plateaus*. On their  
401 basis single plateaus are specified. Also, different modes of PT are tested and discussed for  
402 each sediment core on the basis of age records and correlations used by conventional age  
403 control widely accepted by paleoceanographers. PT, however, is leading to a much higher  
404 resolution of age tie points, in part to minor modifications of conventional age assignments,  
405 and most important, to a suite of reasonable estimates of local MRA.  
406 -- After all, the suite of glacial-to-deglacial Suigetsu plateaus can now be successfully  
407 reproduced in more than 20 sediment sections from all sectors of the ocean where sufficiently  
408 high sedimentation rates occur (some records are still in process of publication). A marked  
409 plateau of an Early Holocene tree ring record was reproduced in three neighboring cores from  
410 the northern Norwegian Sea.

411

412 **3.4/ How to identify marine  $^{14}\text{C}$ -age plateaus within single cores in the context of a changing**  
413 ***and unknown sedimentation rate/ calendar age scale.***

414 This question has already been answered at length in preceding sections 3.3 and 2.2: PT  
415 identifies suites of plateaus strictly on the basis of initial stratigraphic guidelines based on  
416 conventional chronostratigraphic records widely accepted amongst paleoceanographers. PT  
417 has led to major refinements, in part also to modifications of conventional age control due to  
418  $^{14}\text{C}$  records with centennial-scale resolution.

419

420 **3.5/ Definition of  $^{14}\text{C}$  plateau boundaries: Results of visual inspection versus estimates based on**  
421 ***calculation of the 1st derivative of  $^{14}\text{C}$ -age vs depth curve***

422 Comparative tests (Sarnthein et al., 2015; Fig. 2a) revealed good agreement of plateau  
423 boundaries deduced by visual inspection and by calculating the 1st derivative, though  
424 differential analytical errors have not been considered in these tests. Optimizing the kernel to

425 the data set of the specific record requires a continued use of visual inspection. Evidence  
426 accumulated over the years suggests that <sup>14</sup>C jumps reflected by maximums in the 1st  
427 derivative present the best-reproducible evidence to calculate the position of plateau  
428 boundaries in a marine sediment record (Ausin et al., 2021). To some degree this finding that  
429 forms a backbone of the novel age control induced by PT may indeed support the 'staircase'  
430 model of B&H as compared to our 'rung ladder' model, an item discussed in Section 2.3.

431

432 **3.6/ Simulation tests to assess the ability to identify and tune <sup>14</sup>C-age plateaus in the context of**  
433 *'noisy and sparse' <sup>14</sup>C data. To find the underlying calendar age scale in marine sediments B&H*  
434 *compare a tree ring-based IntCal20 record vs a 'pseudo-Suigetsu' atmospheric record and a*  
435 *pseudo-Cariaco marine record for the period 12-13.9 cal ka.*

436

437 **3.7/ Second series of simulation tests to assess the ability to identify and tune <sup>14</sup>C-age plateaus**  
438 *in pseudo-marine sediment records (similar to that of Cariaco) by tuning to a pseudo-*  
439 *atmospheric record.*

440

441 **3.8/ Differences in the precision of reconstructing past atmospheric <sup>14</sup>C levels -- A basic**  
442 *discussion of Lake Suigetsu and tree ring vs. IntCal20 records.*

443

444 A detailed answer to B&H discussion sections **3.6 - 3.8** is found in a companion contribution to  
445 this discussion, given by P.M. Grootes and M. Sarnthein, this volume of CPD.

446

447 .....

448

#### 449 REFERENCES

450 Adolphi, F., Muscheler, R., Friedrich, M., Gütler, D., Wacker, L., Talamo, S., Kromer, B. Radiocarbon  
451 calibration uncertainties during the last deglaciation: Insight from now floating tree-ring chronologies.  
452 Quaternary Science Reviews, 170, 98-108. doi.org/10.1016/j.quascirev.2017.06.026, 2017

453 Ausin, B., Haghypour, N., Wacker, L., Voelker, A. H. L., Hodell, D., Magill, C., Looser N., Bernasconi  
454 S.M., Eglinton T.I. Radiocarbon age offsets between two surface dwelling planktonic foraminifera species  
455 during abrupt climate events in the SW Iberian margin. Paleoceanography and Paleoclimatology, 34, 63-  
456 78, doi: 10.1029/2018PA003490, 2019

457 Ausin, B., M. Sarnthein, N. Haghypour, 2021. Glacial-to-deglacial reservoir and ventilation ages  
458 on the southwest Iberian continental margin. – Quaternary Science Reviews, 255, 106818 (1-12 pp.)

459 S0277-3791(21)00025-1, doi.org/10.1016/j.quascirev.2021.106818

460 Balmer, S. and Sarnthein, M.: Planktic <sup>14</sup>C plateaus, a result of short-term sedimentation pulses? –

461 Radiocarbon, 58, DOI:10.1017/RDC.2016.100, 11 pp., 2016.

462 Balmer, S., Sarnthein, M., Mudelsee, M., and Grootes, P. M.: Refined modeling and 14C plateau

463 tuning reveal consistent patterns of glacial and deglacial 14C reservoir ages of surface waters in low-

464 latitude Atlantic. *Paleoceanography*, 31. doi:10.1002/2016PA002953, 2016.

465 Bard, E. Correction of accelerator mass spectrometry 14C ages measured on planktonic foraminifera:

466 Paleoceanographic implications. *Paleoceanography*, 3, 635-645. doi:10.1029/PA003i006p00635, 1988.

467 Bard, E., Arnold, M., Duprat, J., Moyes, J. and Duplessy, J.C. Reconstruction of the last deglaciation:

468 deconvolved records of δ18O profiles, micropaleontological variations and accelerator mass

469 spectrometric 14C dating. *Climate Dynamics*, 1, 101-112. doi:10.1007/BF01054479, 1987.

470 Bard, E., Arnold, M., Mangerud, M., Paterne, M., Labeyrie, L., Duprat, J., Mélières, M.A.,

471 Sonstegaard, E., Duplessy, J.C. The North Atlantic atmosphere-sea surface 14C gradient during the

472 Younger Dryas climatic event. *Earth and Planetary Science Letters* 126, 275-287. doi: 10.1016/0012-

473 821X(94)90112-0, 1994.

474 Bard, E. and Heaton, T.J.: On the tuning of plateaus in atmospheric and oceanic <sup>14</sup>C records to derive

475 calendar chronologies of deep-sea cores and records of <sup>14</sup>C marine reservoir age changes. *Climate of the*

476 *Past, Discussion*, <https://doi.org/10.5194/cp-2020-164>, 2021.

477 Bronk Ramsey, C., Staff, R.A., Bryant, C.L., Brock, F., Kitagawa, H., van der Plicht, J., Scholout, G.,

478 Marshall, M.H., Brauer, A., Lamb, H.F., Payne, R.L., Tarasov, P.E., Haraguchi, T., Gotanda, K., Yonenobu,

479 H., Yokoyama, Y., Tada, R., Nakagawa, T., A Complete terrestrial radiocarbon record for 11.2 to 52.8 kyr

480 BP. *Science* 338:370-374, 2012.

481 Bronk Ramsey, C., Heaton, T.J., Scholout, G., Staff, R.A., Bryant, C.L., Brauer, A., Lamb,

482 H.F., Marshall, M.H., Nakagawa, T. Reanalysis of the atmospheric radiocarbon calibration

483 record from Lake Suigetsu, Japan. *Radiocarbon* 62, 989-999, doi: 10.1017/RDC.2020.18, 2020.

484 Butzin, M., Heaton, T.J., Köhler, P., and Lohmann, G.: A short note on marine reservoir age

485 simulations used in INTCAL20. *Radiocarbon*, oo, 1-7, DOI:10.1017/RDC.2020.9, 2020.

486 Cheng, H., Edwards, R.L., Southon, J., Matsumoto, K., Feinberg, J.M., Sinha, A., Zhou, W., Li, H., Li, X.

487 and Xu, Y. Atmospheric 14C/12C changes during the last glacial period from Hulu Cave. *Science*,

488 362(6420), 1293–1297, 2018.

489 de la Fuente, M., Skinner, L., Calvo, E., Pelejero, C., Cacho, I. Increased reservoir ages and poorly

490 ventilated deep waters inferred in the glacial Eastern Equatorial Pacific. *Nat. Commun.* 6:7420 doi:

491 10.1038/ncomms8420, 2015

492 Dorale, J.A. and Liu, Z. Limitations of Hendy test criteria in judging the paleoclimatic

493 suitability of speleothems and the need for replications. *J. of Cave and Karst Studies*, 71, 73-80.

494 2009

495 Duplessy, J-C., Arnold, M., Maurice, P., Bard, E., Duprat, J., Moyes, J.: Direct dating of the oxygen-

496 isotope record of the last deglaciation by <sup>14</sup>C accelerator mass spectrometry. *Nature* 320, 350-352, 1986.

497 Gebhardt, H., Sarnthein, M., Kiefer, T., Erlenkeuser, H., Schmieder, F., and Röhl, U.: Paleonutrient and

498 productivity records from the subarctic North Pacific for Pleistocene glacial terminations I to V.

499 *Paleoceanography* 23, PA4212, 1-21, doi:10.1029/2007PA001513, 2008.

500 Heaton, T.J., Köhler, P., Butzin, M., Bard, E., Reimer, R.W., Austin, W.E.N., Bronk Ramsey, C., Grootes,

501 P.M., Hughen, K.A., Kromer, B., Reimer, P.J., Adkins, J.F., Burke, A., Cook, M.S., Olsen, J., Skinner, L.C.

502 Marine20 - the marine radiocarbon age calibration curve (0-55,000 cal BP). *Radiocarbon* 62, 821-863,

503 DOI: 10.1017/RDC.2020.68, 2020a.



504 Huguen, K.A., Southon, J.A., Lehman, S.J., Bertrand, C.J.H., Turnbull, J. Marine-Derived <sup>14</sup>C Calibration  
505 and activity record for the past 50,000 years updated from the Cariaco Basin, *Quaternary Science*  
506 *Reviews* 25: 3216-3227, 2006.

507 Kong, X., Wang, Y., Wu, J., Cheng, H., Edwards, R.L., and Wang, X.: Complicated responses of  
508 stalagmite  $\delta^{13}\text{C}$  to climate change during the last glaciation from Hulu Cave, Nanjing, China, *Science in*  
509 *China Ser. D Earth Sciences*, 48, (12), 2174-2181, 2005.

510 Küssner, K., Sarnthein, M., Lamy, F., and Tiedemann, R.: High-resolution radiocarbon based age  
511 records trace episodes of Zoophycos burrowing, *845 Marine Geology*, 403, 48-56,  
512 doi:10.1016/j.margeo.2018.04.01, 2018.

513 Küssner, K., Sarnthein, M., Michel, E., Mollenhauer, G., Ronge, T.A., Siani, G., and Tiedemann, R.:  
514 Glacial to deglacial reservoir sages of surface waters in the southern South Pacific, *PANGAEA*,  
515 <https://doi.org/10.1594/PANGAEA.922671>, 2020.

516 Rae, J., Sarnthein, M., Foster, G., Ridgwell, A., Grootes, P.M., and Elliott T.: Deep water formation in  
517 the North Pacific and deglacial CO<sub>2</sub> rise, *Paleoceanography*, 29, doi:10.1002/2013PA002570, 645–667,  
518 2014.

519 Reimer P.J., Austin W.E.N., Bard E., Bayliss A., Blackwell P.G., Bronk Ramsey C., Butzin M., Cheng H.,  
520 Edwards R.L., Friedrich M., Grootes P.M., Guilderson T.P., Hajdas I., Heaton T.J., Hogg A.G., Huguen K.A.,  
521 Kromer B., Manning S.W., Muscheler R., Palmer J.G., Pearson C., van der Plicht H., Reimer R.W., Richards  
522 D., Scott E.M., Southon J.R., Turney C.S.M., Wacker L., Adophi F., Büntgen U., Capano M., Fahrni S.,  
523 Fogtmann-Schulz A., Friedrich R., Kudsk S., Miyake F., Olsen J., Reinig F., Minoru Sakamoto M., Sookdeo  
524 A., Talamo S. The IntCal20 Northern Hemisphere radiocarbon calibration curve (0-55 kcal BP).  
525 *Radiocarbon* 62, 725-757, doi: 10.1017/RDC.2020.41, 2020.

526 Sarnthein, M., Grootes, P.M., Kennett, J.P., Nadeau, M.J. 14C Reservoir ages show deglacial changes  
527 in ocean currents, in: *Ocean Circulation: Mechanisms and Impacts*, *Geophysical Monograph Series* 173,  
528 edited by: Schmittner, A., Chiang, J., and Hemming, S., American Geophysical Union, Washington, DC,  
529 175-197, doi: 10.1029/173GM0X, 2007.

530 Sarnthein, M., Balmer, S., Grootes, P.M., and Mudelsee, M.: Planktic and benthic 14C reservoir  
531 ages for three ocean basins, calibrated by a suite of 14C plateaus in the glacial-to-deglacial Suigetsu  
532 atmospheric 14C record, *Radiocarbon*, 57, 129-151, doi:10.2458/azu\_rc.57.17916, 2015.

533 Sarnthein, M., Küssner, K., Grootes, P.M., Ausin, B., Eglinton, T., Muglia, J., Muscheler, R.,  
534 Schlolaut, G. Plateaus and jumps in the atmospheric radiocarbon record – Potential origin and  
535 value as global age markers for glacial-to-deglacial paleoceanography, a synthesis. *Climate of the Past*,  
536 16, 2547–2571, doi: 10.5194/cp-16-2547-2020, 2020

537 Siani, G., Michel, E., De Pol-Holz, R., DeVries, T., Lamy, F., Carel, M., Isguder, G., Dewilde, F.,  
538 Lourantou, A.: Carbon isotope records reveal precise timing of enhanced Southern Ocean upwelling  
539 during the last deglaciation, *Nature Communications*, 4, 2758, 2013.

540 Skinner, L.C., Fallon, S., Waelbroeck, C., Michel, E., and Barker, S.: Ventilation of the deep Southern  
541 Ocean and deglacial CO<sub>2</sub> rise, *Science*, 328, 1147–1151, 2010.

542 Southon, J., Noronha, A.L., Cheng, H, Edwards, R.L., and Wang, Y.: A high-resolution record of  
543 atmospheric <sup>14</sup>C based on Hulu Cave speleothem H82, *Quaternary Science Reviews*, 33:32-41, 2012.

544 Svetlik, I., Jull, A., Molnár, M., Povinec, P., Kolář, T., Demján, P., Pachnerova Brabcova K, Brychova V,  
545 Dreslerová D, Rybníček M, Simek, P. The Best possible time resolution: How precise could a radiocarbon  
546 dating method be? *Radiocarbon*, 61(6), 1729-1740. doi:10.1017/RDC.2019.134, 2019

547 Trauth, M.H., Sarnthein, M. and M. Arnold, M.: Bioturbational mixing depth and carbon flux at the  
548 seafloor. - *Paleoceanography*, 12, 517-526., 1997.
